# Supplementary material for: Effects of Higher Serum Lipid Levels on the Risk of Parkinson's Disease: A Systematic Review and Meta-Analysis
Source: PubMed Central journal article supplement (PMC7332704; doi:10.3389/fneur.2020.00597), 2020-06-26
Supplement: Data_Sheet_1.pdf [file Data_Sheet_1.pdf]

---

**Supplementary Table 1** MEDLINE, EMBASE, ACP Journal Club, COCHRANE, and so on via OvidSP.

---

1. exp Parkinson Disease/
  2. exp parkinsonism/
  3. Parkinson\$.ab,ti.
  4. (PD or IPD).ab,ti.
  5. (paralysis adj2 agitans).ab,ti.
  6. or/1-5
  7. exp cholesterol/
  8. (cholesterol\$ or epicholesterol\$ or azacosterol\$ or diazacholesterol\$ or hydroxycholesterol\$ or 19-iodocholesterol\$ or iodocholesterol\$ or ketocholesterol\$ or oxocholesterol\$ or HDL or LDL or HDL-C or LDL-C or lipoprotein\$ or triglyceride\$ or hypercholester\$ or hyperlipoprotein\$ or hyperlipidemi\$ or hypertriglyceridemi\$ or hypocholester\$ or hypolipoprotein\$ or hypolipidemi\$ or hypotriglyceridemi\$).ab,ti.
  9. or/7-8
  10. 6 and 9
  11. exp animals/ not humans.sh.
  12. 10 not 11
  13. remove duplicates from 12
  14. limit 13 to yr="1988-current"
- 

**Specific Electronic Databases with Dates of Coverage:**

EBM Reviews - Cochrane Database of Systematic Reviews (2005 to March 19, 2020),  
EBM Reviews - ACP Journal Club (1991 to February 2020),  
EBM Reviews - Database of Abstracts of Reviews of Effects (1st Quarter 2016),  
EBM Reviews - Cochrane Clinical Answers (March 2020),  
EBM Reviews - Cochrane Central Register of Controlled Trials (February 2020),  
EBM Reviews - Cochrane Methodology Register (3rd Quarter 2012),  
EBM Reviews - Health Technology Assessment (4th Quarter 2016),  
EBM Reviews - NHS Economic Evaluation Database (1st Quarter 2016),  
Embase (1974 to 2020 March 25),  
Ovid MEDLINE(R) and Epub Ahead of Print, In-Process & Other Non-Indexed Citations, Daily and Versions(R) (March 25, 2020)

---

**Supplementary Table 2A** Characteristics of included cohort studies.

| Author (Year)    | Study location | Cohort Name                                                           | Serum lipid parameters | Data                        | Follow-up time(years)                     | Cohort size (% M) | Age(years)                   | Cases | Outcome definition | Exposure                    | Quantity                                                 | RR(95% CI)                                              | Variables adjusted                                                                                                                            | NOS |
|------------------|----------------|-----------------------------------------------------------------------|------------------------|-----------------------------|-------------------------------------------|-------------------|------------------------------|-------|--------------------|-----------------------------|----------------------------------------------------------|---------------------------------------------------------|-----------------------------------------------------------------------------------------------------------------------------------------------|-----|
| Rozani(2018)†    | Israel/Europe  | Maccabi Health Services                                               | TC, LDL-C, HDL-C       | Dose-response+ High vs. Low | 7.9 (mean)                                | 261638 (42.7)     | M 47.1(mean)<br>F 45.6(mean) | 764   | HR                 | TC                          | M tertiles:3 vs. 1<br>F tertiles:3 vs. 1                 | 0.71(0.55–0.93)<br>0.93(0.63–1.38)                      | age, sex                                                                                                                                      | 9/9 |
|                  |                |                                                                       |                        |                             |                                           |                   |                              |       |                    | LDL-C                       | M tertiles:3 vs. 1<br>F tertiles:3 vs. 1                 | 0.72(0.54–0.95)<br>0.88(0.62–1.29)                      |                                                                                                                                               |     |
|                  |                |                                                                       |                        |                             |                                           |                   |                              |       |                    | HDL-C                       | M tertiles:3 vs. 1<br>F tertiles:3 vs. 1                 | 1.06(0.83–1.34)<br>1.21(0.85–1.74)                      |                                                                                                                                               |     |
| Nam(2018)        | Korea/Asia     | National Health Insurance Service of South Korea                      | HDL-C, TG              | High vs. Low                | 5.3 (mean)                                | 17163560 (48.8)   | ≥40                          | 44205 | HR                 | HDL-C (mg/dL)<br>TG (mg/dL) | M ≥40 vs. <40*<br>F ≥50 vs. <50*<br>≥150 vs. <150        | 0.81(0.80–0.83)<br>1.13(1.10–1.15)                      | age, sex, smoking, alcohol, physical activity, income, BMI, eGFR, history of stroke                                                           | 8/9 |
| Huang(2015)      | US/Americas    | Atherosclerosis Risk in Communities Study                             | TC, LDL-C, HDL-C, TG   | Dose-response+ High vs. Low | 21                                        | 15291 (44.9)      | 54.2(mean)                   | 106   | OR                 | LDL-C                       | Tertiles 3 vs. 1                                         | 0.43(0.21–0.88)                                         | age, sex, race, smoking, caffeine intake, statin                                                                                              | 8/9 |
|                  |                |                                                                       |                        |                             |                                           |                   |                              |       |                    | HDL-C                       | Tertiles 3 vs. 1                                         | 0.64(0.30–1.38)                                         |                                                                                                                                               |     |
|                  |                |                                                                       |                        |                             |                                           |                   |                              |       |                    | TG                          | Tertiles 3 vs. 1                                         | 1.27(0.64–2.53)                                         |                                                                                                                                               |     |
| Hu(2008)         | Finland/Europe | Monitoring Trends and Determinants of Cardiovascular Disease protocol | TC                     | Dose-response+ High vs. Low | 18.1 (mean)                               | 50926 (48.6)      | 25–74                        | 625   | HR                 | TC (mg/dL)                  | Both ≥270 vs. <193<br>M ≥270 vs. <193<br>F ≥270 vs. <193 | 1.86(1.31–2.63)<br>1.84(1.14–2.95)<br>1.86(1.11–3.13)   | age, study year, BMI, SBP, education, leisure-time physical activity, smoking, alcohol, coffee, tea, cholesterol-lowering agent use, diabetes | 8/9 |
| Friedman(2013)   | Israel/Europe  | Health services clinical database                                     | LDL-C                  | Dose-response+ High vs. Low | 7                                         | 94308 (47.2)      | > 45                         | 1035  | OR                 | LDL-C (mg/dL)               | >160 vs. <100                                            | 0.99(0.77–1.27)                                         | sex, low socioeconomic status, diabetes, ischemic heart disease, hypertension, cerebrovascular accidents, smoking, statin                     | 8/9 |
| Simon(2007)      | US/Americas    | Nurses' Health Study(NHS), Health Professionals Follow-up Study(HPFS) | TC                     | Dose-response+ High vs. Low | NHS<br>12.6 (mean)<br>HPFS<br>18.1 (mean) | 171879 (29.6)     | M 40–75<br>F 30–55           | 530   | RR                 | TC (high cholesterol)       | Both yes vs. no<br>M yes vs. no<br>F yes vs. no          | 0.98 (0.82–1.19)<br>0.36(0.17–0.80)<br>0.54 (0.22–1.30) | age, smoking                                                                                                                                  | 6/9 |
| Saaksjarvi(2015) | Finland/Europe | Mini-Finland Health Survey                                            | TC, HDL-C, TG          | High vs. Low                | 30                                        | 6641 (46.7)       | 30–79                        | 89    | RR                 | TC (mg/dL)                  | ≥193 vs. <193                                            | 0.85 (0.31–2.33)                                        | age, sex, education, smoking, alcohol, exercise, serum vitamin D, coffee                                                                      | 8/9 |
|                  |                |                                                                       |                        |                             |                                           |                   |                              |       |                    | HDL-C (mg/dL)               | M ≥39 vs. <39<br>F ≥50 vs. <50                           | 0.74(0.22–2.43)                                         |                                                                                                                                               |     |
|                  |                |                                                                       |                        |                             |                                           |                   |                              |       |                    | TG (mg/dL)                  | ≥150 vs. <150                                            | 0.52(0.29–0.90)                                         |                                                                                                                                               |     |

To be continued

|                    |                   |                                                                  |           |                             |              |              |            |      |    |                       |                                                          |                                                       |                                                                                                                |     |
|--------------------|-------------------|------------------------------------------------------------------|-----------|-----------------------------|--------------|--------------|------------|------|----|-----------------------|----------------------------------------------------------|-------------------------------------------------------|----------------------------------------------------------------------------------------------------------------|-----|
| Huang(2008)        | Japan/Asia        | Honolulu-Asia Aging Study                                        | LDL-C     | Dose-response+ High vs. Low | 3.3 (mean)   | 3233 (100)   | 77(mean)   | 41   | RR | LDL-C (mg/dL)         | ≥135 vs. <85                                             | 0.60(0.40–1.10)                                       | age, smoking, coffee intake, bowel movement frequency, HDL-C, alcohol intake, presence of Apo e2 alleles, CASI | 7/9 |
| Grandinetti(1994)† | Japan/Asia        | Honolulu-Asia Aging Study                                        | TC        | High vs. Low                | 26           | 8006 (100)   | 71–93      | 58   | RR | TC (high cholesterol) | Yes vs. no                                               | 0.73(0.43–1.24)                                       | age                                                                                                            | 6/9 |
| De Lau(2006)       | Netherland/Europe | Rotterdam Study                                                  | TC, HDL-C | Dose-response+ High vs. Low | 9.4 (mean)   | 6465 (41.1)  | 69(mean)   | 87   | HR | TC (mg/dL)            | Both >286 vs. <228<br>M >274 vs. <216<br>F >293 vs. <236 | 0.55(0.30–1.04)<br>0.86(0.36–2.02)<br>0.16(0.05–0.55) | age, sex                                                                                                       | 8/9 |
| Benn(2017) †       | Denmark/Europe    | Copenhagen General Population Study, Copenhagen City Heart Study | LDL-C     | Dose-response+ High vs. Low | 8.2 (median) | 111194 (45)  | 56(median) | 460  | HR | LDL-C (mg/dL)         | ≥154 vs. <70*                                            | 0.59(0.36–0.97)                                       | age, sex, birth year, smoking, alcohol, physical inactivity, income, education, menopause for women            | 8/9 |
| Jeong(2019)†       | Korea/Asia        | National Health Screening Program                                | TC        | Dose-response+ High vs. Low | 9.9(median)  | 76043 (51.5) | 68.5(mean) | 1427 | HR | TC (mg/dL)            | ≥300 vs. 200–240                                         | 1.53(0.77–3.05)                                       | age, sex, BMI, income, smoking, alcohol, physical activity, hypertension, diabetes, SBP, FBG                   | 9/9 |

\*Reference values were converted to the lowest exposure category form(see method). †: excluding statin users in the high vs. low analysis for serum lipid parameters. OR: odds ratio, RR: relative risk, HR: hazard ratio, CI: confidence interval, TC: total cholesterol, LDL-C: low-density lipoprotein cholesterol, HDL-C: high-density lipoprotein cholesterol, TG: triglycerides, PD: Parkinson's disease, NOS: Newcastle-Ottawa Scale, US: the United States of America. NA: not available, BMI: Body Mass Index, CASI: Cognitive Abilities Screening Instrument, SBP: systolic blood pressure, FBG: fasting blood glucose, eGFR: estimated glomerular filtration rate, M: Male, F: female.

**Supplementary Table 2B** Characteristics of included case-control studies.

| Author (Year) | Study location | Serum lipid parameters | Data         | Cases (% male) | Controls (% male) | Age                                     | Outcome definition | Exposure                 | Quantity                                                                                                      | RR(95% CI)                                                               | Variables adjusted                                                                                                                          | NOS |
|---------------|----------------|------------------------|--------------|----------------|-------------------|-----------------------------------------|--------------------|--------------------------|---------------------------------------------------------------------------------------------------------------|--------------------------------------------------------------------------|---------------------------------------------------------------------------------------------------------------------------------------------|-----|
| Vikdahl(2015) | Sweden/Europe  | TC, TG                 | High vs. Low | 84(54.7)       | 336(54.7)         | NA                                      | HR                 | TC (mg/dL)<br>TG (mg/dL) | Both Per 38.6mg/dL increase<br>M Per 38.6mg/dL increase<br>F Per 38.6mg/dL increase<br>Per 88.5mg/dL increase | 0.95(0.77–1.19)<br>0.91(0.68–1.23)<br>0.95(0.68–1.33)<br>0.64(0.41–1.01) | age, BMI, physical activity, smoking                                                                                                        | 8/9 |
| Miyake(2010)  | Japan /Asia    | TC                     | High vs. Low | 249(37.4)      | 368(38.3)         | Cases 68.5(mean)<br>Controls 66.6(mean) | OR                 | TC (high cholesterol)    | Yes vs. no                                                                                                    | 0.58(0.33–0.97)                                                          | sex, age, region of residence, smoking, education, leisure-time exercise, BMI, dietary energy, cholesterol, vitamin E, alcohol, coffee, DGI | 5/9 |
| Savica(2012)† | US/Americas    | TC                     | High vs. Low | 196(61.7)      | 196(61.7)         | Cases 71(median)<br>Controls NA         | OR                 | TC (mg/dL)               | >300 vs. <300                                                                                                 | 1.49(0.73–3.04)                                                          | age, sex, smoking, coffee                                                                                                                   | 7/9 |

†: excluding statin users in the high vs. low meta-analysis for serum lipid parameters. OR: odds ratio, RR: relative risk, HR: hazard ratio, CI: confidence interval, TC: total cholesterol, TG: triglycerides, PD: Parkinson's disease, NOS: Newcastle-Ottawa Scale, US: the United States of America, NA: not available, BMI: Body Mass Index, M: male, F: female.

**Supplementary Table 3** Summarized dose-response data for the relationship between serum TC and PD risk.

| Serum TC(mg/dL)            | No. of cases | No. of participants or person-years/controls | Relative Risk(95% CI) |
|----------------------------|--------------|----------------------------------------------|-----------------------|
| <b>Rozani(2018) Male</b>   |              | Person-years                                 | HR                    |
| <180                       | 175‡         | 294565§                                      | 1                     |
| 180–209                    | 144‡         | 294564§                                      | 0.82 (0.66–1.01)      |
| ≥210                       | 124‡         | 294564§                                      | 0.71 (0.55–0.93)      |
| <b>Rozani(2018) Female</b> |              | Person-years                                 | HR                    |
| <180                       | 103‡         | 294565§                                      | 1                     |
| 180–209                    | 103‡         | 294564§                                      | 1.00 (0.74–1.34)      |
| ≥210                       | 97‡          | 294564§                                      | 0.93 (0.63–1.38)      |
| <b>Hu(2008)</b>            |              | Person-years                                 | HR                    |
| <193                       | 39           | 152754                                       | 1                     |
| 193–228                    | 141          | 272129                                       | 1.42 (1.00–2.03)      |
| 232–266                    | 195          | 263672                                       | 1.56 (1.10–2.21)      |
| ≥270                       | 250          | 232261                                       | 1.86 (1.31–2.63)      |
| <b>Simon(2007) Male</b>    |              | Person-years                                 | RR                    |
| <159                       | 27           | 38238                                        | 1                     |
| 159–179                    | 20           | 42245                                        | 0.64 (0.36–1.15)      |
| 179–199                    | 35           | 60639                                        | 0.78 (0.47–1.29)      |
| 199–219                    | 33           | 63238                                        | 0.69 (0.42–1.15)      |
| 219–269                    | 50           | 64281                                        | 1.02 (0.64–1.63)      |
| ≥270                       | 8            | 27423                                        | 0.36 (0.17–0.80)      |
| <b>Simon(2007) Female</b>  |              | Person-years                                 | RR                    |
| <159                       | 13           | 85109                                        | 1                     |
| 159–179                    | 17           | 82313                                        | 1.38 (0.67–2.85)      |
| 179–199                    | 28           | 107924                                       | 1.58 (0.82–3.04)      |
| 199–219                    | 26           | 144698                                       | 0.96 (0.49–1.86)      |
| 219–269                    | 49           | 188113                                       | 1.24 (0.67–2.28)      |
| ≥270                       | 8            | 64266                                        | 0.54 (0.22–1.30)      |
| <b>de Lau(2006)</b>        |              | Participants                                 | HR                    |
| <228                       | 30‡          | 15178§                                       | 1                     |
| 228–255                    | 25‡          | 15177§                                       | 0.82 (0.48–1.41)      |
| 259–286                    | 16‡          | 15177§                                       | 0.55 (0.30–1.02)      |
| >286                       | 16‡          | 15177§                                       | 0.55 (0.30–1.04)      |
| <b>Jeong(2019)</b>         |              | Participants                                 | HR                    |
| 160–200*                   | 606‡         | 32608                                        | 1                     |
| 200–240*                   | 470‡         | 25310                                        | 1.05 (0.87–1.28)      |
| 240–300*                   | 156‡         | 8400                                         | 1.06 (0.83–1.36)      |
| ≥300*                      | 12‡          | 618                                          | 1.61 (0.81–3.20)      |

\*: reference values were converted to the lowest exposure category form(see method).

‡: case number calculated from the reported number of total cases, number of participants or person-years for each quantile and RR(see method).

§: the number of participants/person-years for each quantile was assumed to be approximately equal(see method).

HR: hazard ratio, CI: confidence interval, TC: total cholesterol, PD: Parkinson's disease.

**Supplementary Table 4** Summarized dose-response data for the relationship between serum LDL-C and PD risk.

| Serum LDL-C(mg/dL)         | No. of cases | No. of participants or person-years/controls | Relative Risk(95% CI) |
|----------------------------|--------------|----------------------------------------------|-----------------------|
| <b>Rozani(2018) Male</b>   |              | Person-years                                 | HR                    |
| <110                       | 176‡         | 294565§                                      | 1                     |
| 110–139                    | 141‡         | 294564§                                      | 0.80 (0.65–0.98)      |
| ≥140                       | 126‡         | 294564§                                      | 0.72 (0.54–0.95)      |
| <b>Rozani(2018) Female</b> |              | Person-years                                 | HR                    |
| <110                       | 106‡         | 294565§                                      | 1                     |
| 110–139                    | 104‡         | 294564§                                      | 0.98 (0.76–1.28)      |
| ≥140                       | 93‡          | 294564§                                      | 0.88 (0.62–1.29)      |
| <b>Friedman(2013)</b>      |              | Participants                                 | OR                    |
| <100                       | 137‡         | 15760                                        | 1                     |
| 100–130                    | 289‡         | 30189                                        | 1.10(0.90–1.32)       |
| 130–160                    | 267‡         | 26773                                        | 1.15(0.94–1.40)       |
| >160                       | 131‡         | 15247                                        | 0.99(0.77–1.27)       |
| <b>Huang(2008)</b>         |              | Participants                                 | RR                    |
| <80                        | 9            | 513                                          | 1                     |
| 80–100                     | 11           | 667                                          | 0.94(0.52–1.70)¶      |
| 100–120                    | 8            | 837                                          | 0.54(0.29–1.03)¶      |
| 120–140                    | 9            | 689                                          | 0.74(0.40–1.39)¶      |
| 140–160                    | 3            | 325                                          | 0.53(0.22–1.26)¶      |
| >160                       | 1            | 202                                          | 0.28(0.07–1.12)¶      |
| <b>Benn(2017)</b>          |              | Participants                                 | HR                    |
| <70*                       | 20           | 3774                                         | 1                     |
| 70–100*                    | 75           | 18395                                        | 0.80(0.48–1.34)       |
| 100–154*                   | 231          | 51957                                        | 0.69(0.43–1.12)       |
| ≥154*                      | 113          | 26359                                        | 0.59(0.36–0.97)       |

\*: reference values were converted to the lowest exposure category form (see method).

‡: case number calculated from the reported number of total cases, number of participants or person-years for each quantile and RR(see method).

¶: RR and its 95% CI estimated from the number of cases and participants for each quantile (see method).

§: the number of participants/person-years for each quantile was assumed to be approximately equal(see method).

OR: odds ratio, RR: relative risk, HR: hazard ratio, CI: confidence interval, LDL-C: low-density lipoprotein cholesterol, PD: Parkinson's disease.

**Supplementary Table 5** Subgroup analyses (serum HDL-C levels and PD risk).

| Variables                                            | No. of studies | Test of association |                | Test of heterogeneity |                |
|------------------------------------------------------|----------------|---------------------|----------------|-----------------------|----------------|
|                                                      |                | Pooled RR (95%CI)   | <i>P</i> value | I <sup>2</sup> (%)    | <i>P</i> value |
| <b>Study location</b>                                |                |                     |                |                       |                |
| Europe                                               | 3              | 1.19(0.85–1.66)     | 0.306          | 24.7                  | 0.265          |
| Americas                                             | 1              | 0.64(0.30–1.38)     | 0.252          | —                     | —              |
| Asia                                                 | 1              | 0.81 (0.80–0.83)    | 0.000          | —                     | —              |
| <b>Statin adjustment<br/>/excluding statin users</b> |                |                     |                |                       |                |
| YES                                                  | 2              | 0.96(0.60–1.52)     | 0.850          | 44.9                  | 0.178          |
| NO                                                   | 3              | 1.03(0.58–1.85)     | 0.913          | 67.6                  | 0.046          |
| <b>Gender</b>                                        |                |                     |                |                       |                |
| Male                                                 | 2              | 1.08(0.86–1.36)     | 0.523          | 0                     | 0.581          |
| Female                                               | 2              | 1.62(0.76–3.45)     | 0.209          | 63.0                  | 0.100          |

RR: relative risk, CI: confidence interval, NOS: Newcastle-Ottawa Scale, PD: Parkinson’s disease, HDL-C: high-density lipoprotein cholesterol. *P* value for heterogeneity within subgroup.
